# Supplementary material for: Transcriptional upregulation of galectin-3 in multiple sclerosis
Source: Springer Nature journal article supplement (doi:10.1007/s12026-023-09408-x), 2023-07-25
Supplement: MOESM2 [file 25845236]

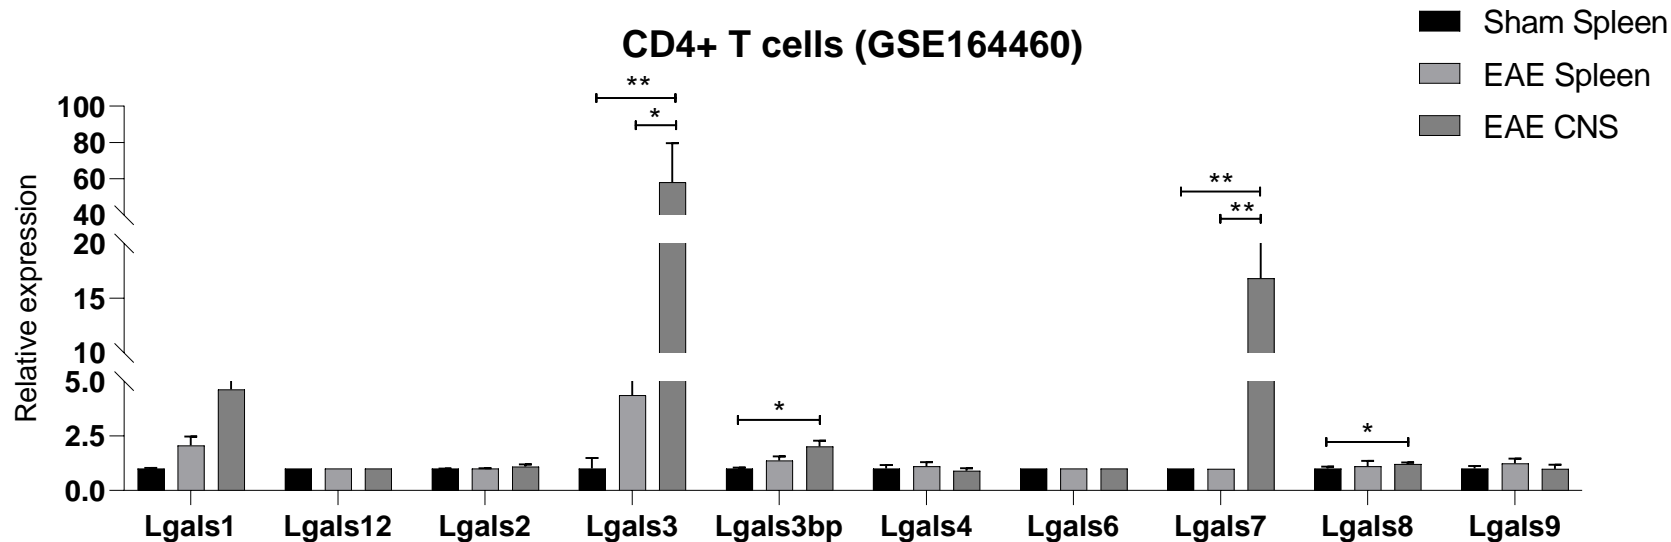

Data were retrieved from the GSE164460 microarray dataset, available on the Gene Expression Omnibus (GEO) database. CD4+ T cells were isolated from the spleen of naïve mice and from the spleen and central nervous system of mice at the peak of experimental autoimmune encephalomyelitis (EAE) induced by immunization with MOG (35-55). RNA was isolated from astrocytes and analyzed using the Affymetrix Mouse Genome 430 2.0 Array. Raw data were pre-processed and normalized using GCRMA. Detailed description of the experimental design can be retrieved from Pohar J et al., 2022 (PMID: 35579560). Statistical differences among experimental groups were assessed using LIMMA and p values adjusted using Benjamini-Hochberg correction. An FDR<0.05 was considered as threshold for statistical significance. \*FDR<0.05; \*\*FDR<0.01; \*\*\*FDR<0.001.
